# Supplementary material for: Genetic and epigenetic factors affect RET gene expression in breast cancer cell lines and influence survival in patients
Source: PubMed Central journal article supplement (PMC5041993; doi:10.18632/oncotarget.8417), 2016-03-28
Supplement: oncotarget-07-26465-s001.pdf [file oncotarget-07-26465-s001.pdf]

## SUPPLEMENTARY DATA

### MATERIALS AND METHODS

#### ***Quantitative Real Time PCR (qRT-PCR): long term RET mRNA stability***

mRNA half-life was detected in the T47D cell line after 6 hrs and 12 hrs treatments with 5,6-Dichloro-1-Beta-D-ribofuranosylbenzimidazole (DRB), an inhibitor of transcription. Total RNA from cells was isolated by a commercial RNA purification kit (RNeasyMini kit, Qiagen, GmbH, Germany) according to the manufacturer's protocol. One  $\mu\text{g}$  of total RNA was reverse transcribed with iScript cDNA Synthesis kit (Bio-Rad Hercules, CA, USA) according to the manufacturer's protocol. Real-time quantitative PCR was performed using inventoried Assays-on-Demand™ (Thermo Fisher Scientific, Waltham, MA USA) Hs01120027\_m1 to detect the *RET* gene and Hs99999903\_m1 to detect the reference gene *Beta-Actin*. PCR reactions were performed using the iQ™5 Real Time PCR (Bio-Rad Hercules, CA, USA). The expression of mRNA was evaluated using the relative Ct method ( $\Delta\Delta\text{Ct}$ ) and Real Time PCR amplification was performed in triplicate and repeated at least twice.

#### ***Quantitative Real Time PCR (qRT-PCR): IL-8 expression in response to RET activation***

MCF7 and T47D cell lines were grown as reported in the full paper and stimulated with human GDNF and human GFR $\alpha$ 1 at the final concentration of 100 ng/ml and 1 $\mu\text{g/ml}$  respectively (R&D Systems Minneapolis, MN, USA). Cells were then incubated at 37°C in 5% CO<sub>2</sub> and harvested at 6 and 24 hours after treatment. Total RNA was isolated by a commercial RNA purification kit

(RNeasyMini kit, Qiagen, GmbH, Germany) according to the manufacturer's protocol. One  $\mu\text{g}$  of total RNA was reverse transcribed with iScript cDNA Synthesis kit (Bio-Rad) according to the manufacturer's protocol. Real-time quantitative PCR was performed using inventoried Assays-on-Demand™ (Applied Biosystem). The expression of IL-8 receptor, *CXCR2*, was studied with the assay Hs00174304\_m1. PCR reactions were performed using the iQ™5 Real Time PCR (Bio-Rad Laboratories). The expression of mRNA was evaluated using the relative Ct method ( $\Delta\Delta\text{Ct}$ ) and Real Time PCR amplification was performed in triplicate and repeated at least twice.

#### ***Quantitative Real Time PCR (qRT-PCR): RET expression in patients' BC cells***

Total RNA was obtained from paraffin-embedded samples of different patients using RecoverAll™ Total Nucleic Acid Isolation Kit for FFPE (ThermoFisher Waltham, MA USA #1975). 500 ngs of extracted RNA were reverse transcribed with iScript cDNA Synthesis kit (BioRad #170-8891) according to the manufacturer's protocol. Quantitative Real-Time PCR was performed using inventoried Assays-on-Demand™ provided by Applied Biosystem. TaqMan probe human Hs01120027\_m1 was used to detect the *RET* gene and Hs99999907\_m1 was used to detect the reference human gene *B2M*. PCR reactions were performed using the iQ™5 Real Time PCR (Bio-Rad Laboratories). The mRNA expression was evaluated using the relative Ct method ( $\Delta\Delta\text{Ct}$ ) and Real Time PCR amplification was performed in triplicate and repeated at least twice.

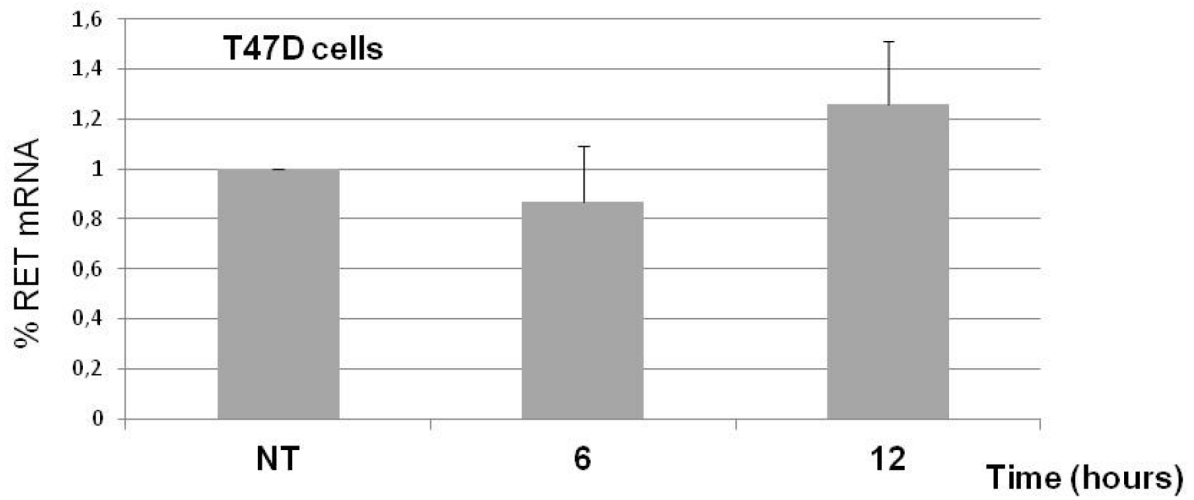

**Supplementary Figure S1: Quantification of *RET* mRNA stability after 6 and 24 hours of DRB treatments in T47D cells.** Values are the mean  $\pm$ SD of at least two independent experiments performed in triplicate. No difference between the three conditions has resulted significant ( $p > 0.05$ ).

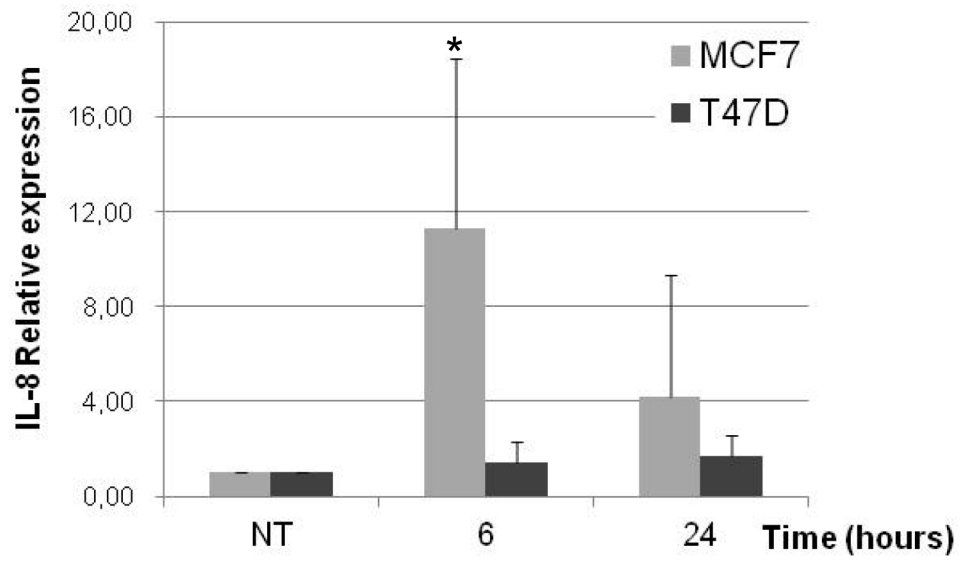

**Supplementary Figure S2: *IL-8* expression in MCF7 and T47D cells treated for 6 and 24 hours with GDNF/GRF $\alpha$ 1.** Values are the mean  $\pm$ SD of at least two independent experiments performed in triplicate; asterisks (\*) indicate statistically significant differences ( $*p < 0.05$ ).

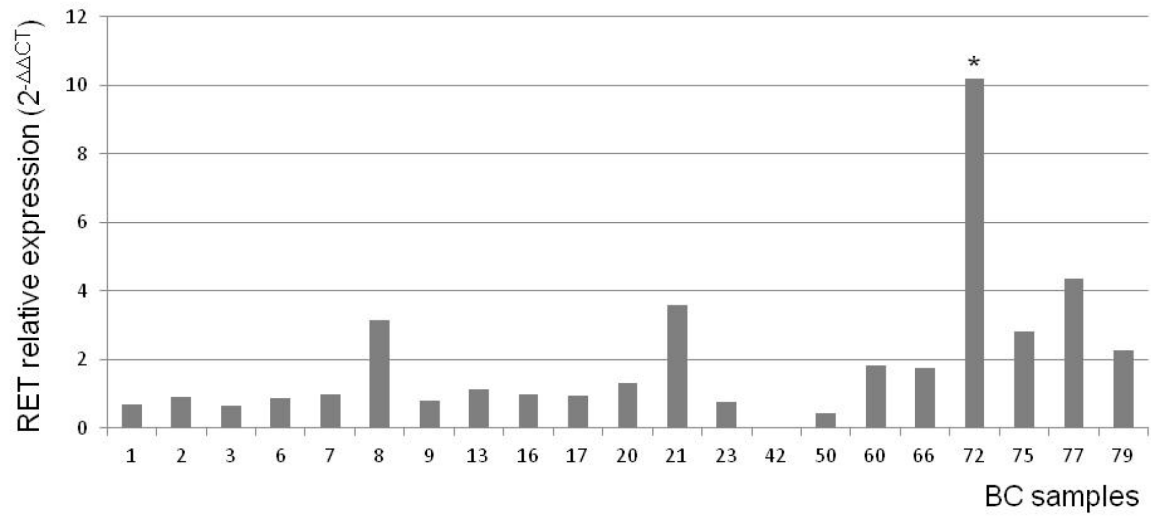

**Supplementary Figure S3: *RET* relative expression levels (fold changes over the mean expression of all the samples) estimated in RNA extracted from tumor tissues of BC patients.** Values are the mean of at least two independent experiments performed in triplicate. The asterisk indicates a statistically significant outlier level of expression, as assessed after performing the Grubbs' test.
